# Supplementary material for: Proteomic signatures of infertile men with clinical varicocele and their validation studies reveal mitochondrial dysfunction leading to infertility
Source: PubMed Central journal article supplement — Asian J Androl. 2015 Dec 29;18(2):282–91. doi: 10.4103/1008-682X.170445 (PMC4770500; doi:10.4103/1008-682x.170445), 2015-12-29
Supplement: AJA-18-282_Suppl1.pdf [file AJA-18-282_Suppl1.pdf]

**Supplementary Table 1: Summary data of all DEP in varicocele group compared to the fertile group highlighting protein abundance, expression (overexpressed, underexpressed, and unique) and enriched pathways with respect to related proteins as revealed by GO, STRAP, DAVID, and reactome analysis**

| UniProt number | Protein name                                                                        | Level | Carbohydrate metabolism | Cell death and survival | Cell-to-cell signaling and interaction | Cellular assembly and organization | Cellular function and maintenance | Small molecule biochemistry | Cellular growth and proliferation | Posttranslational modifications | Cellular development |
|----------------|-------------------------------------------------------------------------------------|-------|-------------------------|-------------------------|----------------------------------------|------------------------------------|-----------------------------------|-----------------------------|-----------------------------------|---------------------------------|----------------------|
| P02751         | Fibronectin isoform 3 preproprotein                                                 | ↑     | x                       | x                       | x                                      | x                                  | x                                 |                             |                                   |                                 |                      |
| P54652         | Heat shock-related 70 protein 2                                                     | ↓     |                         |                         |                                        |                                    |                                   |                             | x                                 |                                 | x                    |
| Q5BJF6         | Outer dense fiber protein 2 isoform 3                                               | ↑     |                         |                         |                                        | x                                  | x                                 |                             |                                   |                                 |                      |
| P49221         | Protein-glutamine gamma-glutamyltransferase 4                                       | ↑     |                         |                         |                                        |                                    |                                   |                             |                                   |                                 |                      |
| O75369         | Filamin-B isoform 2                                                                 | ↑     |                         |                         |                                        | x                                  |                                   |                             |                                   |                                 |                      |
| Q9BXF9         | Tektin-3                                                                            | ↑     |                         |                         |                                        | x                                  |                                   |                             |                                   |                                 |                      |
| Q96KP4         | Cytosolic nonspecific dipeptidase isoform 1                                         | ↑     |                         |                         |                                        |                                    |                                   |                             |                                   |                                 |                      |
| P05164         | Myeloperoxidase precursor                                                           | ↑     |                         |                         |                                        |                                    |                                   |                             |                                   |                                 |                      |
| Q96QE4         | Leucine-rich repeat-containing protein 37B precursor                                | ↓     |                         |                         |                                        |                                    |                                   |                             |                                   |                                 |                      |
| P24752         | Acetyl-CoA acetyltransferase, mitochondrial precursor                               | ↓     |                         |                         |                                        |                                    |                                   |                             |                                   |                                 |                      |
| Q9Y265         | RUVBL1                                                                              | ↓     |                         |                         |                                        |                                    |                                   | x                           | x                                 |                                 | x                    |
| P40939         | Trifunctional enzyme subunit alpha, mitochondrial precursor                         | ↓     |                         |                         |                                        |                                    |                                   |                             |                                   |                                 |                      |
| Q99798         | Aconitate hydratase, mitochondrial precursor                                        | ↓     | x                       |                         |                                        |                                    |                                   | x                           |                                   |                                 |                      |
| Q8NEB7         | Acrosin-binding protein precursor                                                   | ↓     |                         |                         |                                        |                                    |                                   |                             | x                                 |                                 | x                    |
| P22695         | Cytochrome b-c1 complex subunit 2, mitochondrial precursor                          | ↓     |                         |                         |                                        |                                    |                                   |                             |                                   |                                 |                      |
| P46940         | Ras GTPase-activating-like protein IQGAP1                                           | ↑     |                         | x                       | x                                      | x                                  |                                   |                             |                                   |                                 |                      |
| P11177         | Pyruvate dehydrogenase E1 component subunit beta, mitochondrial isoform 1 precursor | ↓     |                         |                         |                                        |                                    |                                   |                             |                                   |                                 |                      |
| A6NMS7         | Leucine-rich repeat-containing protein 37A precursor                                | ↓     |                         |                         |                                        |                                    |                                   |                             |                                   |                                 |                      |
| P20160         | Azurocidin preproprotein                                                            | ↑     |                         |                         |                                        |                                    |                                   |                             |                                   |                                 |                      |
| P26640         | Vallyl-tRNA synthetase                                                              | ↓     |                         |                         |                                        |                                    |                                   |                             |                                   |                                 |                      |
| Q9H0K4         | Radial spoke head protein 6 homolog A                                               | ↓     |                         |                         |                                        |                                    |                                   |                             |                                   |                                 |                      |
| P53396         | ATP-citrate synthase isoform 1                                                      | ↑     | x                       | x                       |                                        |                                    |                                   |                             |                                   |                                 |                      |
| Q06210         | Glucosamine-fructose-6-phosphate aminotransferase (isomerizing) isoform 1           | ↑     |                         |                         |                                        |                                    |                                   |                             |                                   |                                 |                      |
| Q16891         | Mitochondrial inner membrane protein isoform 3                                      | ↓     |                         |                         |                                        |                                    |                                   | x                           |                                   |                                 |                      |
| Q96FJ2         | Dynein light chain 2, cytoplasmic                                                   | ↓     |                         |                         |                                        |                                    |                                   |                             |                                   |                                 |                      |
| Q92597         | Protein NDRG1                                                                       | ↑     |                         | x                       | x                                      | x                                  |                                   |                             |                                   |                                 |                      |
| Q15506         | Sperm surface protein Sp17                                                          | ↓     |                         |                         |                                        |                                    |                                   |                             | x                                 |                                 | x                    |
| P29692         | Elongation factor 1-delta isoform 1                                                 | ↓     |                         |                         |                                        |                                    |                                   |                             | x                                 |                                 | x                    |
| Q95757         | Heat shock 70 protein 4L                                                            | ↓     |                         |                         |                                        |                                    |                                   |                             | x                                 |                                 | x                    |
| P31937         | 3-hydroxyisobutyrate dehydrogenase, mitochondrial precursor                         | ↓     |                         |                         |                                        |                                    |                                   |                             |                                   |                                 |                      |
| P28331         | NADH-ubiquinone oxidoreductase 75 subunit, mitochondrial isoform 1                  | ↓     |                         |                         |                                        |                                    |                                   |                             |                                   |                                 |                      |
| P11215         | Integrin alpha-M isoform 1 precursor                                                | UV    |                         |                         |                                        |                                    |                                   |                             |                                   |                                 |                      |
| P13667         | Protein disulfide-isomerase A4 precursor                                            | ↓     |                         |                         |                                        |                                    |                                   |                             |                                   |                                 |                      |
| O75390         | Citrate synthase, mitochondrial precursor                                           | ↓     |                         |                         |                                        |                                    |                                   | x                           |                                   |                                 |                      |
| P10644         | cAMP-dependent protein kinase type I-alpha regulatory subunit                       | ↓     |                         |                         |                                        |                                    |                                   | x                           | x                                 |                                 | x                    |
| Q9H1X1         | Radial spoke head protein 9 homolog isoform 1                                       | ↓     |                         |                         |                                        |                                    |                                   |                             |                                   |                                 |                      |
| Q13733         | Sodium/potassium-transporting ATPase subunit alpha-4 isoform 1                      | ↓     |                         |                         |                                        |                                    |                                   | x                           | x                                 |                                 | x                    |
| P56597         | Nucleoside diphosphate kinase homolog 5                                             | ↓     |                         |                         |                                        |                                    |                                   |                             | x                                 |                                 | x                    |

Contd...

**Supplementary Table 1: Contd...**

| UniProt number | Protein name                                                                                     | Level | Carbohydrate metabolism | Cell death and survival | Cell-to-cell signaling and interaction | Cellular assembly and organization | Cellular function and maintenance | Small molecule biochemistry | Cellular growth and proliferation | Posttranslational modifications | Cellular development |
|----------------|--------------------------------------------------------------------------------------------------|-------|-------------------------|-------------------------|----------------------------------------|------------------------------------|-----------------------------------|-----------------------------|-----------------------------------|---------------------------------|----------------------|
| P05107         | Integrin beta-2 precursor                                                                        | UV    |                         |                         |                                        |                                    |                                   |                             |                                   |                                 |                      |
| P10606         | Cytochrome c oxidase subunit 5B, mitochondrial precursor                                         | ↓     |                         |                         |                                        |                                    |                                   |                             |                                   |                                 |                      |
| P29144         | Tripeptidyl-peptidase 2                                                                          | ↓     |                         |                         |                                        |                                    |                                   |                             |                                   |                                 |                      |
| P50213         | NAD subunit alpha, mitochondrial precursor                                                       | ↓     | x                       |                         |                                        |                                    |                                   | x                           |                                   |                                 |                      |
| Q8N1F7         | Nuclear pore complex protein Nup93 isoform 1                                                     | ↓     |                         |                         |                                        |                                    |                                   |                             |                                   |                                 |                      |
| Q9UNM6         | 26S proteasome non-ATPase regulatory subunit 13 isoform 1                                        | ↓     |                         |                         |                                        |                                    |                                   |                             | x                                 |                                 | x                    |
| Q92526         | T-complex protein 1 subunit zeta-2 isoform 1                                                     | ↓     |                         |                         |                                        |                                    |                                   |                             | x                                 |                                 | x                    |
| P61769         | Beta-2-microglobulin precursor                                                                   | ↓     |                         |                         |                                        |                                    |                                   |                             |                                   |                                 |                      |
| Q96AB3         | Isochorismatase domain-containing protein 2, mitochondrial isoform 2                             | ↓     |                         |                         |                                        |                                    |                                   |                             |                                   |                                 |                      |
| P16219         | Short-chain specific acyl-CoA dehydrogenase, mitochondrial precursor                             | ↓     |                         |                         |                                        |                                    |                                   | x                           |                                   |                                 |                      |
| P29803         | Pyruvate dehydrogenase E1 component subunit alpha, testis-specific form, mitochondrial precursor | ↓     |                         |                         |                                        |                                    |                                   |                             |                                   |                                 |                      |
| Q7Z3B4         | Nucleoporin p54                                                                                  | ↓     |                         |                         |                                        |                                    |                                   |                             |                                   | x                               |                      |
| Q96E40         | Uncharacterized protein C9orf9                                                                   | ↓     |                         |                         |                                        |                                    |                                   |                             |                                   |                                 |                      |
| P30519         | Heme oxygenase 2                                                                                 | ↓     |                         |                         |                                        |                                    |                                   | x                           |                                   |                                 |                      |
| P30084         | Enoyl-CoA hydratase, mitochondrial                                                               | ↓     |                         |                         |                                        |                                    |                                   |                             |                                   |                                 |                      |
| O14967         | Calmequin precursor                                                                              | ↓     |                         |                         |                                        |                                    |                                   |                             |                                   |                                 |                      |
| P10253         | Lysosomal alpha-glucosidase preproprotein                                                        | ↓     | x                       |                         |                                        |                                    |                                   |                             | x                                 |                                 | x                    |
| Q9NUJ1         | Abyhdrolase domain-containing protein 10, mitochondrial precursor                                | ↓     |                         |                         |                                        |                                    |                                   |                             |                                   |                                 |                      |
| O00303         | Eukaryotic translation initiation factor 3 subunit F                                             | ↓     |                         |                         |                                        |                                    |                                   |                             |                                   |                                 |                      |
| Q13011         | Delta(3.5)-Delta(2.4)-dienoyl-CoA isomerase, mitochondrial precursor                             | ↓     |                         |                         |                                        |                                    |                                   |                             |                                   |                                 |                      |
| Q15046         | Lysyl-tRNA synthetase isoform 1                                                                  | ↓     |                         |                         |                                        |                                    |                                   |                             | x                                 |                                 |                      |
| Q5JVL4         | EF-hand domain-containing protein 1 isoform 1                                                    | ↓     |                         |                         |                                        |                                    |                                   |                             |                                   |                                 |                      |
| O43837         | NAD subunit beta, mitochondrial isoform a precursor                                              | ↓     |                         |                         |                                        |                                    |                                   |                             |                                   |                                 |                      |
| Q9NY47         | Voltage-dependent calcium channel subunit alpha-2/delta-2 isoform c                              | ↓     |                         |                         |                                        |                                    |                                   |                             | x                                 |                                 | x                    |
| Q13200         | 26S proteasome non-ATPase regulatory subunit 2                                                   | ↓     |                         |                         |                                        |                                    |                                   |                             |                                   |                                 |                      |
| Q5JRA6         | Melanoma inhibitory activity protein 3 precursor                                                 | ↓     |                         |                         |                                        |                                    |                                   |                             |                                   |                                 |                      |
| O95202         | LETM1 and EF-hand domain-containing protein 1, mitochondrial precursor                           | ↓     |                         |                         |                                        |                                    |                                   |                             |                                   |                                 |                      |
| Q96M32         | AK7                                                                                              | ↓     |                         |                         |                                        |                                    |                                   |                             | x                                 |                                 | x                    |
| O00487         | 26S proteasome non-ATPase regulatory subunit 14                                                  | ↓     |                         |                         |                                        |                                    |                                   |                             |                                   |                                 |                      |
| Q02218         | 2-oxoglutarate dehydrogenase, mitochondrial isoform 3 precursor                                  | ↓     |                         |                         |                                        |                                    |                                   | x                           |                                   |                                 |                      |
| P52907         | F-actin-capping protein subunit alpha-1                                                          | ↓     |                         |                         |                                        |                                    |                                   |                             |                                   |                                 |                      |
| P09668         | Pro-cathepsin H preproprotein                                                                    | ↓     |                         |                         |                                        |                                    |                                   |                             |                                   |                                 |                      |
| Q5T655         | Coiled-coil domain-containing protein 147                                                        | ↓     |                         |                         |                                        |                                    |                                   |                             |                                   |                                 |                      |
| Q9NS69         | Mitochondrial import receptor subunit TOM22 homolog                                              | ↓     |                         |                         |                                        |                                    |                                   |                             |                                   |                                 |                      |
| P36543         | V-type proton ATPase subunit E 1 isoform a                                                       | ↓     |                         |                         |                                        |                                    |                                   |                             |                                   |                                 | x                    |
| Q53EV4         | Leucine-rich repeat-containing protein 23 isoform a                                              | ↓     |                         |                         |                                        |                                    |                                   |                             |                                   |                                 |                      |
| Q96NG3         | Tetrapeptide repeat protein 25                                                                   | ↓     |                         |                         |                                        |                                    |                                   |                             |                                   |                                 |                      |

*Contd...*

**Supplementary Table 1: Contd...**

| UniProt number | Protein name                                                        | Level | Carbohydrate metabolism | Cell death and survival | Cell-to-cell signaling and interaction | Cellular assembly and organization | Cellular function and maintenance | Small molecule biochemistry | Cellular growth and proliferation | Posttranslational modifications | Cellular development |
|----------------|---------------------------------------------------------------------|-------|-------------------------|-------------------------|----------------------------------------|------------------------------------|-----------------------------------|-----------------------------|-----------------------------------|---------------------------------|----------------------|
| P02647         | Apolipoprotein A-I preproprotein                                    | ↓     | x                       |                         |                                        |                                    |                                   | x                           | x                                 |                                 |                      |
| Q96HS1         | Serine/threonine-protein phosphatase PGAM5, mitochondrial isoform 1 | ↓     |                         |                         |                                        |                                    |                                   |                             |                                   |                                 |                      |
| Q75WM6         | Testis-specific H1 histone                                          | ↓     |                         |                         |                                        |                                    |                                   |                             |                                   |                                 |                      |
| Q75976         | Carboxypeptidase D isoform 1 precursor                              | ↓     |                         |                         |                                        |                                    |                                   |                             |                                   |                                 |                      |
| Q9UKU0         | Long-chain-fatty-acid-CoA ligase 6 isoform e                        | ↓     |                         |                         |                                        |                                    |                                   | x                           | x                                 |                                 | x                    |
| Q9UI14         | Prenylated Rab acceptor protein 1                                   | ↓     |                         |                         |                                        |                                    |                                   |                             |                                   |                                 |                      |
| Q5T124         | UBX domain-containing protein 11 isoform 1                          | ↓     |                         |                         |                                        |                                    |                                   |                             |                                   |                                 | x                    |
| Q13347         | Eukaryotic translation initiation factor 3 subunit I                | ↓     |                         |                         |                                        |                                    |                                   |                             | x                                 |                                 | x                    |
| P37198         | Nuclear pore glycoprotein p62                                       | ↓     |                         |                         |                                        |                                    |                                   |                             |                                   |                                 |                      |
| Q9BSF0         | UPF0733 protein C2orf88                                             | ↓     |                         |                         |                                        |                                    |                                   |                             |                                   |                                 |                      |
| Q13618         | Cullin-3                                                            | ↓     |                         |                         |                                        |                                    |                                   |                             | x                                 |                                 | x                    |
| P62826         | GTP-binding nuclear protein Ran                                     | ↓     |                         |                         |                                        |                                    |                                   | x                           | x                                 |                                 | x                    |
| P56192         | Methionyl-tRNA synthetase, cytoplasmic                              | ↓     |                         |                         |                                        |                                    |                                   |                             |                                   |                                 |                      |
| P17612         | cAMP-dependent protein kinase catalytic subunit alpha isoform 2     | ↓     |                         |                         |                                        |                                    |                                   |                             |                                   |                                 |                      |
| E9KL36         | Transthyretin precursor                                             | ↓     |                         |                         |                                        |                                    |                                   |                             |                                   |                                 |                      |
| Q6PGQ1         | Uncharacterized protein C22orf43                                    | UF    |                         |                         |                                        |                                    |                                   |                             |                                   |                                 |                      |
| Q9BVL2         | Nucleoporin p58/p45 isoform a                                       | UF    |                         |                         |                                        |                                    |                                   |                             |                                   |                                 |                      |
| Q5VTT2         | Uncharacterized protein C9orf135                                    | UF    |                         |                         |                                        |                                    |                                   |                             | x                                 |                                 | x                    |
| Q96M95         | Coiled-coil domain-containing protein 42A isoform 1                 | UF    |                         |                         |                                        |                                    |                                   |                             |                                   |                                 |                      |
| Q7Z4H3         | HDDC2                                                               | UF    |                         |                         |                                        |                                    |                                   |                             |                                   |                                 |                      |
| Q9BVM2         | Protein DPCD                                                        | UF    |                         |                         |                                        |                                    |                                   |                             |                                   |                                 |                      |
| P21281         | V-type proton ATPase subunit B, brain isoform                       | UF    |                         |                         |                                        |                                    |                                   |                             |                                   |                                 |                      |
| P52272         | Heterogeneous nuclear ribonucleoprotein M isoform a                 | UF    |                         |                         |                                        |                                    |                                   |                             |                                   |                                 |                      |
| Q86Y82         | Syntaxin-12                                                         | UF    |                         |                         |                                        |                                    |                                   |                             |                                   |                                 |                      |

UF: unique to fertile group; UV: unique to varicocele group; DEP: differentially expressed proteins; GO: gene ontology; STRAP: Software for Researching Annotations of Proteins; DAVID: Database for Annotation, Visualization and Integrated Discovery; RUVBL1: RuvB-like 1; NDRG1: N-myc downstream-regulated protein 1; NAD: isocitrate dehydrogenase; HDDC2: HD domain-containing protein 2; DPCD: protein DPCD; AK7: adenylylate kinase 7
