# Supplementary material for: Proteomic signatures of infertile men with clinical varicocele and their validation studies reveal mitochondrial dysfunction leading to infertility
Source: PubMed Central journal article supplement — Asian J Androl. 2015 Dec 29;18(2):282–91. doi: 10.4103/1008-682X.170445 (PMC4770500; doi:10.4103/1008-682x.170445), 2015-12-29
Supplement: AJA-18-282_Suppl2.pdf [file AJA-18-282_Suppl2.pdf]

**Supplementary Table 2: Proteins involved in key functions that are underexpressed and may contribute to sperm dysfunction or in the development of varicocele as revealed by GO, STRAP, DAVID and reactome analysis**

| Function                  | UniProt number | Accession number | Gene name | Protein name                                                  | Protein function                                                                                                                                                                                                                                                                                                                           |
|---------------------------|----------------|------------------|-----------|---------------------------------------------------------------|--------------------------------------------------------------------------------------------------------------------------------------------------------------------------------------------------------------------------------------------------------------------------------------------------------------------------------------------|
| Spermatogenesis           | Q8NEB7         | 17999524         | ACRBP     | Acrosin binding protein                                       | Expressed in testis. Phosphorylated in Involved in packaging and condensation of acrosin zymogen in the acrosomal matrix via its association with proacrosin                                                                                                                                                                               |
|                           | Q96M32         | 148727333        | AK7       | Adenylate kinase 7                                            | Involved in spermatogenesis                                                                                                                                                                                                                                                                                                                |
|                           | Q13733         | 153946397        | ATP1A4    | Sodium/potassium-transporting ATPase subunit alpha-4          | Specifically found in the testis. Expressed in mature sperm. Provides energy for active transport of nutrients. Involved in motility                                                                                                                                                                                                       |
|                           | Q92526         | 58331173         | CCT6B     | T-complex protein 1 subunit zeta-2                            | Molecular chaperone. Involved in protein (actin and tubulin) folding                                                                                                                                                                                                                                                                       |
|                           | P54652         | 13676857         | HSPA2     | Heat shock-related 70 kDa protein 2                           | Stabilizes preexistent proteins against aggregation and mediate folding of newly translated polypeptides in the cytosol as well as within the organelles. They bind with a net hydrophobic character during membrane translocation or following stress-induced damage                                                                      |
|                           | O95757         | 31541941         | HSPA4L    | Heat shock 70 kDa protein 4L                                  | Possesses chaperone activity. Protein involved in stress response (such as temperature)                                                                                                                                                                                                                                                    |
|                           | P56597         | 4505413          | NMES      | Nucleoside diphosphate kinase homolog 5                       | Confers protection from cell death and alters the cellular levels of several antioxidant enzymes. May play a role in spermiogenesis by increasing the ability of late-stage spermatids to eliminate reactive oxygen species                                                                                                                |
|                           | Q9Y265         | 4506753          | RUVBL1    | RuvB-like 1                                                   | May participate in transcriptional regulation                                                                                                                                                                                                                                                                                              |
| Sperm motility            | Q15506         | 8394343          | SPA17     | Sperm surface protein Sp17                                    | Sperm surface zona pellucida binding protein. Helps bind spermatozoa to the zona pellucida with high affinity.                                                                                                                                                                                                                             |
|                           | Q13733         | 153946397        | ATP1A4    | Sodium/potassium-transporting ATPase subunit alpha-4          | Catalyzes the hydrolysis of ATP. Plays a role in sperm motility                                                                                                                                                                                                                                                                            |
|                           | P17612         | 46909584         | PRKACA    | cAMP-dependent protein kinase catalytic subunit alpha         | Phosphorylates a large number of substrates in the cytoplasm and the nucleus. Activated by ATP and cAMP. Isoform 2 phosphorylates and activates ABL1 (abelson murine leukemia viral oncogene 1) in sperm flagellum to promote spermatozoa capacitation                                                                                     |
| Mitochondrial dysfunction | P10644         | 4506063          | PRKAR1A   | cAMP-dependent protein kinase type I-alpha regulatory subunit | Regulatory subunit of the cAMP-dependent protein kinases involved in cAMP signaling in cells                                                                                                                                                                                                                                               |
|                           | Q99798         | 4501867          | ACO2      | Aconitate hydratase, mitochondrial                            | Catalyzes the isomerization of citrate to is-citrate                                                                                                                                                                                                                                                                                       |
|                           | P28331         | 33519475         | NDUFS1    | NADH-ubiquinone oxidoreductase 75 kDa subunit, mitochondrial  | Core subunit of mitochondrial membrane respiratory chain NADH dehydrogenase                                                                                                                                                                                                                                                                |
|                           | Q02218         | 259013553        | OGDH      | 2-oxoglutarate dehydrogenase, mitochondrial                   | The 2-oxoglutarate dehydrogenase complex catalyzes the overall conversion of 2-oxoglutarate to succinyl-CoA and CO <sub>2</sub> . Involved in glycolysis                                                                                                                                                                                   |
| Metabolism of nucleotides | P22695         | 50592988         | UQCRC2    | Cytochrome b-c1 complex subunit 2, mitochondrial              | This is a component of the ubiquinol-cytochrome c reductase complex. It is part of the mitochondrial respiratory chain                                                                                                                                                                                                                     |
|                           | Q96M32         | 148727333        | AK7       | Adenylate kinase 7                                            | Nucleoside monophosphate kinase that catalyzes the reversible transfer of the terminal phosphate group between nucleoside triphosphates and monophosphates. Involved in maintaining ciliary structure and function                                                                                                                         |
|                           | P02647         | 4557321          | APOA1     | Apolipoprotein A-I                                            | Participates in the reverse transport of cholesterol from tissues to liver. Activates sperm motility                                                                                                                                                                                                                                       |
|                           | Q13733         | 153946397        | ATP1A4    | Sodium/potassium-transporting ATPase subunit alpha-4          | It is the catalytic component of the active enzyme, which catalysis the hydrolysis of ATP couples with exchange of sodium and potassium ions across the plasma membrane. Provides energy for active transport of various nutrients. Plays a role in sperm motility. Specifically expressed in the testis and mature sperm at protein level |
| Fatty acid metabolism     | P36543         | 4502317          | ATP6V1EJ  | V-type proton ATPase subunit E 1                              | Subunit of the peripheral VI complex of vacuolar ATPase essential for assembly or catalytic function                                                                                                                                                                                                                                       |
|                           | O43837         | 28178821         | IDH3B     | Isocitrate dehydrogenase (NAD) subunit beta, mitochondrial    | Involved in the catalytic activity and conversion of isocitrate and NAD+ to 2-oxoglutarate and NADH                                                                                                                                                                                                                                        |
|                           | P28331         | 33519475         | NDUFS1    | NADH-ubiquinone oxidoreductase 75 kDa subunit, mitochondrial  | Core subunit of the mitochondrial membrane respiratory chain NADH dehydrogenase (Complex I)                                                                                                                                                                                                                                                |
|                           | Q02218         | 259013553        | OGDH      | 2-oxoglutarate dehydrogenase, mitochondrial                   | The 2-oxoglutarate dehydrogenase complex catalyzes the overall conversion of 2-oxoglutarate to succinyl-CoA and CO <sub>2</sub>                                                                                                                                                                                                            |
|                           | P16219         | 4557233          | ACADS     | Short-chain specific acyl-CoA dehydrogenase, mitochondrial    | Involved in lipid metabolism and mitochondrial fatty acid oxidation                                                                                                                                                                                                                                                                        |
|                           | Q9UKUO         | 327412327        | ACSL6     | Short-chain specific acyl-CoA dehydrogenase, mitochondrial    | Involved in lipid metabolism and fatty acid beta- oxidation                                                                                                                                                                                                                                                                                |
|                           | Q13011         | 70995211         | ECH1      | Delta(3,5)-Delta(2,4)-dienoyl-CoA isomerase, mitochondrial    | Involved in fatty beta-oxidation. Located in the mitochondrion, peroxisomes, and membranes                                                                                                                                                                                                                                                 |
| Muscle cell formation     | Q9NY47         | 291290994        | CACNA2D   | Voltage-dependent calcium channel subunit alpha-2/delta-2     | The alpha-2/delta subunit of voltage-dependent calcium channels regulates calcium current density. Highly expressed in the testis                                                                                                                                                                                                          |
|                           | P10253         | 119393891        | GAA       | Lysosomal alpha-glucosidase                                   | Essential for the degradation of glycogen to glucose in lysosomes. Present in lysosomes and                                                                                                                                                                                                                                                |
|                           | P10644         | 4506063          | PRKARIA   | cAMP-dependent protein kinase type I-alpha regulatory subunit | Regulatory subunit of the cAMP-dependent protein kinases involved in cAMP signaling in cells                                                                                                                                                                                                                                               |

GO: gene ontology; STRAP: Software for Researching Annotations of Proteins; DAVID: Database for Annotation, Visualization and Integrated Discovery; NAD: isocitrate dehydrogenase
